# Supplementary material for: Baseline Expression of Immune Gene Modules in Blood is Associated With Primary Response to Anti-TNF Therapy in Crohn’s Disease Patients
Source: PubMed Central journal article supplement (PMC10906954; doi:10.1093/ecco-jcc/jjad166), 2023-09-30

Models with clinical covariates excluded

Models with interaction terms between drug and propensity score components added

Adjusted for cell proportions

Unadjusted for cell proportions

Adjusted for cell proportions

Unadjusted for cell proportions

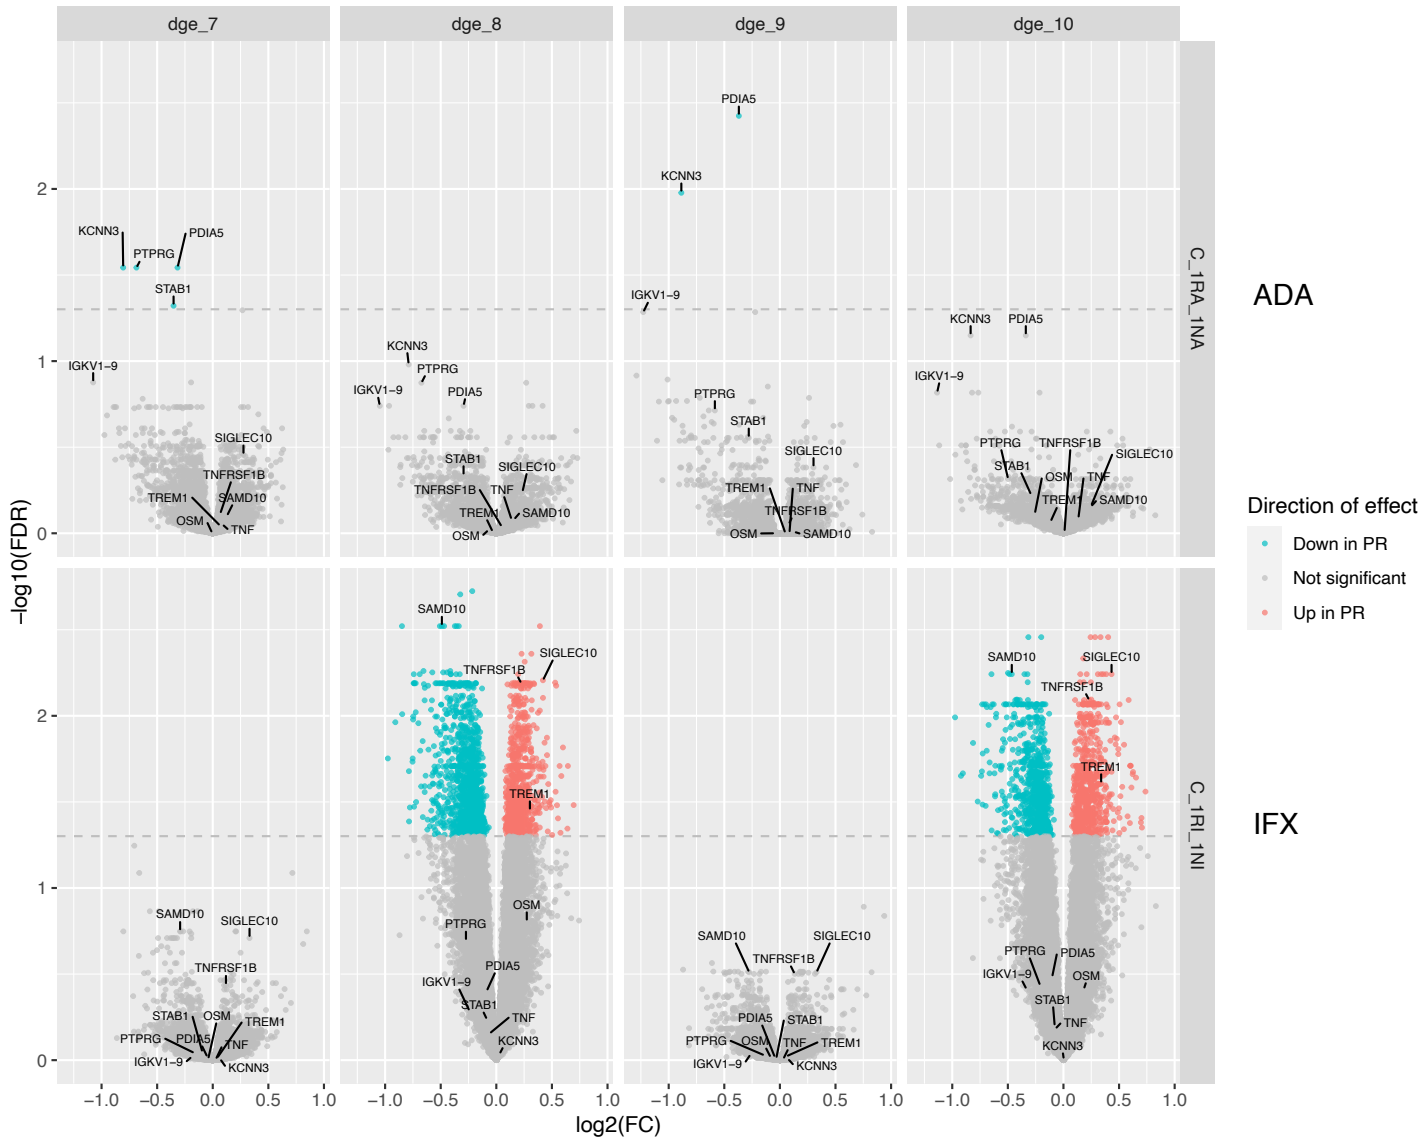

Supplement: jjad166_suppl_supplementary_figure_s4.pdf [file jjad166_suppl_supplementary_figure_s4.pdf]
