# Supplementary material for: Baseline Expression of Immune Gene Modules in Blood is Associated With Primary Response to Anti-TNF Therapy in Crohn’s Disease Patients
Source: PubMed Central journal article supplement (PMC10906954; doi:10.1093/ecco-jcc/jjad166), 2023-09-30

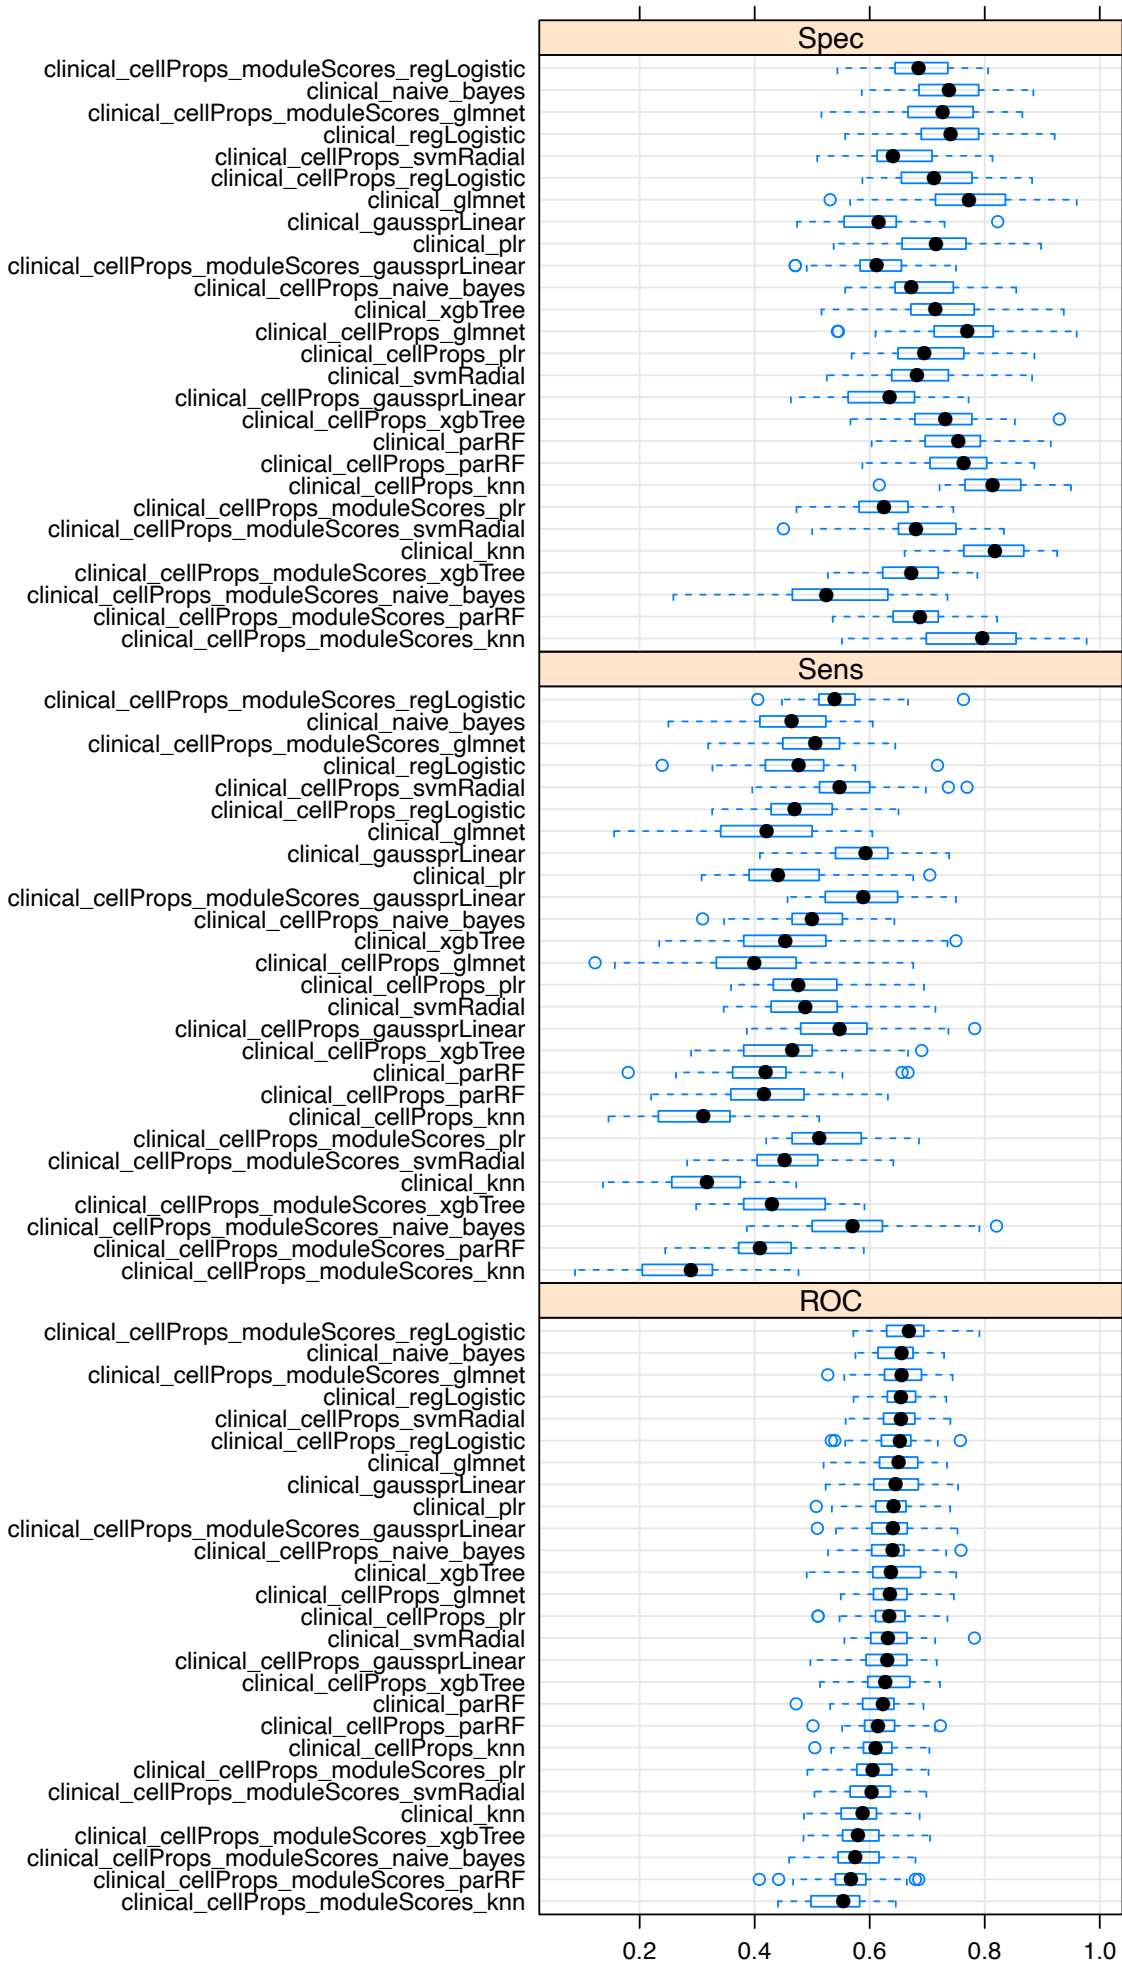

Supplement: jjad166_suppl_supplementary_figure_s8.pdf [file jjad166_suppl_supplementary_figure_s8.pdf]
